# Supplementary material for: The Critical Role of Volatile Organic Compounds Emission in Nitrate Formation in Lhasa, Tibetan Plateau: Insights from Oxygen Isotope Anomaly Measurements
Source: Copernicus journal article supplement (doi:10.5194/egusphere-2025-164), 2025-03-07
Supplement: Supplementary file [file egusphere-2025-164-AC2-supplement.pdf]

*Zheng et al., showed that volatile organic compounds play a critical role in the nitrate production on a plateau city, as inferred from the oxygen isotope anomaly of nitrate ( $\Delta^{17}\text{O}-\text{NO}_3^-$ ). The  $\Delta^{17}\text{O}-\text{NO}_3^-$  hold a wealth information about the atmospheric oxidation environment, which can be used to complement the model work as an observational constraint for  $\text{NO}_x$  chemistry. I believe this study is of significant importance to the community as there are very sparse measurements of oxygen isotope anomaly of nitrate in high-elevation plateau environments. While I agree with most of the interpretation, some of the results, i.e., the day-night difference in  $\Delta^{17}\text{O}-\text{NO}_3^-$  require further deliberation. In addition, considerable improvements could be made in the presentation of the results, refining the methodology, the layout of the figures, as well as enhancing the overall clarity of the writing. Overall, the manuscript should be subjected to major revisions listed below.*

**Response:** We would like to express our deepest gratitude for the constructive comments, which have significantly improved the quality of our work. Below, we provide detailed, point-by-point responses to all the reviewers' comments. All the changes have been included in the newest manuscript (Reviewers' and Editorial Office's comments are in italics; our responses are in regular font).

**Specific comments:**

*1: The author highlights that  $\text{VOCs}+\text{NO}_3$  is of particular important for nitrate formation in Lhasa in spring based on the  $\Delta^{17}\text{O}$  measurements and a simple mass-balance model calculation (i.e., Bayesian). The author did a lot of statistical analysis based on the Bayesian model outputs. It is well known that the Bayesian models of this nature was mathematically underdetermined and there was no unique solution with only one constraint but for three solutions (see Phillips et al., 2014), therefore model results will be associated with significant uncertainty. The comparison, statistical analysis and any conclusions draw from these results should be approached with great caution. For example, the contribution of  $\text{OH}+\text{NO}_2$  likely*

*fluctuates around 50% throughout the year.*

**Response:** Thanks for your valuable suggestion. We fully acknowledge that Bayesian isotope mixing model (SIAR) used in our study is mathematically underdetermined when constrained by a single tracer ( $\Delta^{17}\text{O}-\text{NO}_3^-$ ) and three potential pathways, as discussed in Phillips et al. (2014). As a result, the output carries inherent uncertainty, and the exact source apportionment solutions are not unique.

To assess the robustness of our findings, we conducted a sensitivity analysis by varying two key parameters: (1)  $\alpha$ , the fraction of  $\text{NO}_2$  oxidized by  $\text{O}_3$ , and (2)  $\Delta^{17}\text{O}$  of terminal O atoms in  $\text{O}_3$  ( $\Delta^{17}\text{O}-\text{O}_3^*$ ). As shown in Table S1, both parameters influence the partitioning results. When  $\Delta^{17}\text{O}-\text{O}_3^*$  was fixed at 39‰, increasing  $\alpha$  from 0.7 to 0.9 led to a substantial increase in the contribution of the  $\text{NO}_2 + \text{OH}$  pathway (from 25% to 46%), while the  $\text{NO}_3 + \text{VOC}$  pathway decreased (from 46% to 25%). In contrast, the  $\text{N}_2\text{O}_5 + \text{H}_2\text{O}$  contribution remained nearly constant at 28-29%, indicating its relative insensitivity to  $\alpha$ .

Similarly, when  $\alpha$  was set between 0.8-0.9, increasing  $\Delta^{17}\text{O}-\text{O}_3^*$  from 37‰ to 39‰ resulted in a rise in the  $\text{NO}_2 + \text{OH}$  contribution (from 37% to 46%) and a decline in  $\text{NO}_3 + \text{VOC}$  (from 35% to 26%), while the  $\text{N}_2\text{O}_5 + \text{H}_2\text{O}$  pathway again remained stable. These results suggest that although the  $\text{NO}_2 + \text{OH}$  and  $\text{NO}_3 + \text{VOC}$  pathways are sensitive to assumptions about  $\alpha$  and  $\Delta^{17}\text{O}-\text{O}_3^*$ , the  $\text{N}_2\text{O}_5 + \text{H}_2\text{O}$  pathway is relatively robust across the tested range.

Given that Lhasa is characterized by relatively high VOC concentrations and that  $\Delta^{17}\text{O}-\text{O}_3^*$  is typically close to 39‰, we believe that our parameter assumptions are reasonable.

To address your concern, we have carefully revised the main text to avoid overstatements and now use more cautious language when discussing model-derived pathway contributions. **(Line 333-348)**

**Line 333-348:** To evaluate the impact of key parameters on the estimated contributions of different  $\text{NO}_3^-$  formation pathways, we conducted a sensitivity analysis by assumed the  $\alpha$  values and  $\Delta^{17}\text{O}$  value of the terminal oxygen atoms of  $\text{O}_3$  ( $\Delta^{17}\text{O}-\text{O}_3^*$ ). As listed in Table S3, the assumption of  $\alpha$  and  $\Delta^{17}\text{O}-\text{O}_3^*$  have an impact on the  $\text{NO}_3^-$  formation

mechanisms. When  $\Delta^{17}\text{O}-\text{O}_3^*$  was fixed at 39‰, increasing  $\alpha$  from 0.7 to 0.9 led to a notable increase in the relative contribution of the  $\text{NO}_2 + \text{OH}$  pathway from 25% to 46%, while that of the  $\text{NO}_3 + \text{VOC}$  pathway decreased from 46% to 25%. The  $\text{N}_2\text{O}_5 + \text{H}_2\text{O}$  pathway remained nearly constant, with contributions ranging between 28% and 29%, indicating that this pathway is relatively insensitive to changes in  $\alpha$  values. Similarly, when  $\alpha$  was varied within a reasonable range (0.68-0.93), increasing the  $\Delta^{17}\text{O}-\text{O}_3^*$  value from 37‰ to 39‰ led to an increase in the  $\text{NO}_2 + \text{OH}$  contribution from 37% to 46%, and a corresponding decrease in the  $\text{NO}_3 + \text{VOC}$  contribution from 35% to 26%. Again, the  $\text{N}_2\text{O}_5 + \text{H}_2\text{O}$  contribution remained stable at  $\sim 28\%$ . These results suggest that the estimated contributions of  $\text{NO}_2 + \text{OH}$  and  $\text{NO}_3 + \text{VOC}$  pathways are sensitive to assumptions about  $\alpha$  and  $\Delta^{17}\text{O}-\text{O}_3^*$ , whereas the contribution of the  $\text{N}_2\text{O}_5 + \text{H}_2\text{O}$  pathway is relatively robust under the tested conditions. Because Lhasa is characterized by relatively high VOC concentrations and  $\Delta^{17}\text{O}-\text{O}_3^*$  is generally close to 39‰ in the troposphere, we consider our parameter assumptions reasonable for further estimating  $\text{NO}_3^-$  formation pathways for each sample.

Table S3 The average contribution of three oxidation pathways to  $\text{NO}_3^-$  formation for the different the  $\alpha$  values and  $\Delta^{17}\text{O}-\text{O}_3^*$  values

| parameters                                                      | relative contribution of different oxidation pathways (%) |                          |                                           |
|-----------------------------------------------------------------|-----------------------------------------------------------|--------------------------|-------------------------------------------|
|                                                                 | $\text{NO}_2+\text{OH}$                                   | $\text{NO}_3+\text{VOC}$ | $\text{N}_2\text{O}_5+\text{H}_2\text{O}$ |
| <u><math>\Delta^{17}\text{O}-\text{O}_3^*=39\text{‰}</math></u> |                                                           |                          |                                           |
| $\alpha=0.7$                                                    | 25                                                        | 47                       | 28                                        |
| $\alpha=0.8$                                                    | 41                                                        | 29                       | 30                                        |
| $\alpha=0.9$                                                    | 46                                                        | 26                       | 28                                        |
| <u><math>\alpha=0.68-0.93</math></u>                            |                                                           |                          |                                           |
| $\Delta^{17}\text{O}-\text{O}_3^*=37\text{‰}$                   | 37                                                        | 35                       | 28                                        |
| $\Delta^{17}\text{O}-\text{O}_3^*=38\text{‰}$                   | 42                                                        | 30                       | 28                                        |
| $\Delta^{17}\text{O}-\text{O}_3^*=39\text{‰}$                   | 46                                                        | 26                       | 28                                        |

*2: Regarding the source of VOCs, the authors suggest that high ambient VOCs in spring may originate from South Asia via long-range transport. There are growing evidence that long-range transport of atmospheric pollutants from South Asia regulating the aerosol loadings in south of Tibetan Plateau in spring. Does nitrate aerosol in Lhasa also be impacted by the long-range transport, especially in spring? It is likely that the author assumed that long-range transported VOCs involve in the local nitrate production in Lhasa through  $\text{NO}_3 + \text{VOC}$  pathways. This should be explicitly addressed in the main text.*

**Response:** Thanks for your insightful comment. As suggested, we have revised the main text to explicitly clarify the potential influence of long-range transported VOC on  $\text{NO}_3^-$  formation in Lhasa, particularly during spring. We highlight that air masses originating from South Asia (e.g., Afghanistan, Pakistan, northern India, Nepal) during spring are likely to carry biomass burning-related VOC, which could enhance local  $\text{NO}_3^-$  formation via the  $\text{NO}_3 + \text{VOC}$  pathway. We have also noted that elevated ambient VOC levels in urban areas on the Qinghai-Tibet Plateau, comparable to those in the North China Plain, may be further amplified by this long-range transport. Furthermore, we acknowledged the potential co-transport of nitrogenous species (e.g.,  $\text{NO}$ ,  $\text{NO}_2$ ) associated with biomass burning that could also contribute to  $\text{NO}_3^-$  formation. **(Line 410-440)**

**Line 410-440:** A significant increase in the  $f_{\text{NO}_3 + \text{VOC}}$  values was observed in spring ( $p < 0.05$ ). First,  $\text{O}_3$  and  $\text{NO}_2$  are precursors of  $\text{NO}_3$ . In this work, the highest concentrations of  $\text{O}_3$  were found in spring ( $114.9 \pm 18.1 \mu\text{g}/\text{m}^3$ ), likely leading to elevated  $\text{NO}_3$  concentrations. Additionally, the low temperature and reduced OH radical concentrations in spring facilitate the reaction of  $\text{NO}_2$  and  $\text{O}_3$  to synthesize  $\text{NO}_3$ . This might be an appropriate reason for the  $f_{\text{NO}_3 + \text{VOC}}$  values in spring. High-altitude locations such as Nepal (5079 m a.s.l.) and Qomolangma Station (4300 m a.s.l.) have experienced stratospheric ozone intrusions, especially in spring and winter, as reported in previous studies (Zhang et al., 2025; Cristofanelli et al., 2010; Morin et al., 2007; Zhang et al., 2022; Lin et al., 2016; Yin et al., 2017; Wang et al., 2020b). Notably, such intrusions in spring may elevate tropospheric  $\text{O}_3$  levels in Lhasa, resulting in a mixture

of tropospheric and stratospheric  $O_3$  that enhances  $NO_3^-$  production. Second, previous study has indicated that the Afghanistan-Pakistan-Tajikistan region, the Indo-Gangetic Plain, and Meghalaya-Myanmar region could transport industrial VOC to various zones in Tibet from west to east. Additionally, agricultural areas in northern India could contribute biomass burning-related VOC to the middle-northern and eastern regions of Tibet (Li et al., 2017). During our sampling campaign, South and Southeast Asia air clusters were notably prevalent in the springtime, coinciding with intensive fire spots observed in Afghanistan, Pakistan, India, Nepal, and Bhutan (Figure S3/S4). These observations, combined with the prevailing South and Southeast Asia air mass trajectories in spring, strongly suggest that long-range transported VOC from South Asia were delivered to Lhasa and likely participated in local  $NO_3^-$  production via  $NO_3 + VOC$  pathway. Moreover, recent studies have shown that ambient VOC concentrations in the urban areas on the Qinghai-Tibet Plateau were comparable to those in the North China Plain (Tang et al., 2022). The input of VOC through long-range transport might further elevate VOC concentrations, thereby promoting  $NO_3^-$  formation via  $NO_3 + VOC$  pathway and contributing to the enhanced  $f_{NO_3+VOC}$  values observed in spring. While VOC appears to play a dominant role in the process, it should be noted that other nitrogen species (e.g., NO,  $NO_2$ ) associated with biomass burning emissions may also be transported over long distances and influence  $NO_3^-$  formation in Lhasa. These co-transported nitrogen compounds, although not directly quantified in this study, could further contribute to  $NO_3^-$  production in spring. Taken together, these findings provide strong evidence that long-range transport of biomass burning emissions, particularly from South Asia, can substantially influence springtime  $NO_3^-$  formation in Lhasa.

**3: (1) The methodology for the determination of specific pathway contribution to nitrate based on  $\Delta^{17}O$  should be clearly presented in the Method section. One of the most important of part is the  $A$  value (i.e, the relative importance of  $O_3$  versus  $RO_2$  in  $NO_2$  formation), when using  $\Delta^{17}O$  to distinguish nitrate formation pathways. First, I noticed that the author derived the  $RO_2$  concentrations based on a empirical**

*relationship about O<sub>3</sub> mixing ratio. This relationship between RO<sub>2</sub> and O<sub>3</sub> indeed has been widely used in relevant study as concurrent RO<sub>2</sub> measurement is unavailable. This method is feasible at present. However, the relationship between RO<sub>2</sub> and O<sub>3</sub> the author used in this study is referred to Kanaya et al., 2007, which was conducted in urban site in central Tokyo. I believe that the atmospheric condition in Lhasa is completely different from that in Tokyo, i.e., the dominant RO<sub>2</sub> source. RO<sub>2</sub> production is majorly determined by solar radiations, which is also different between the two sites, as noticed in the Introduction. I recommend the calculation of RO<sub>2</sub> concentrations using MCM model and recent field observations of VOCs at Lhasa (see Chunxiang Ye et al., 2023).*

Response: Thanks for your valuable suggestion. We sincerely thank the reviewer for pointing out the importance of accurately estimating RO<sub>2</sub> concentrations in the calculation of the  $\alpha$  value, which is indeed a critical parameter for  $\Delta^{17}\text{O}$ -based pathway apportionment. As noted, we adopted an empirical relationship between RO<sub>2</sub> and O<sub>3</sub> based on Kanaya et al. (2007), due to the absence of direct RO<sub>2</sub> observations and the lack of local model constraints. We fully acknowledge that this parameterization, developed for urban Tokyo, may not fully reflect the atmospheric conditions in high-altitude Lhasa, particularly given differences in radiation intensity and VOC composition.

Unfortunately, due to the lack of comprehensive VOC datasets and the necessary input parameters, we were unable to conduct a robust MCM (Master Chemical Mechanism) simulation for RO<sub>2</sub> in this study. We agree that such modelling, particularly with reference to recent VOC measurements in Lhasa, would significantly improve the accuracy of pathway estimation. We will prioritize this in our future work as more data becomes available.

*(2) Second, the author also suggests that nighttime RO<sub>2</sub> may play a role in the NO<sub>x</sub> oxidations. Similarly, the derivation of nighttime RO<sub>2</sub> is valid only when O<sub>3</sub> oxidation VOC dominates the RO<sub>2</sub> production (Kanaya et al., 2007). Nighttime RO<sub>2</sub> production mechanisms in Lhasa maybe unknown, however, in other urban cities such as*

*Beijing in China,  $\text{NO}_3$  radical + VOC is the dominant channel for nighttime  $\text{RO}_2$  production. In this case, nighttime  $\text{RO}_2$  will be roughly correlated with the  $\text{NO}_3$  radical production rate,  $k_{\text{O}_3+\text{NO}_2}[\text{O}_3]/[\text{NO}_2]$ . Although, given the high nighttime  $\text{O}_3$  concentration in Lhasa, it maybe reasonable to assume  $\text{O}_3$  dominant nighttime NO oxidation. To improve the robustness of the pathway differentiation, I recommend that this part could be done according to the approach of Alexander et al., 2020, and compare the field  $\Delta^{17}\text{O}-\text{NO}_3^-$  measurements with the model results in Alexander et al., 2020.*

Response: Thanks for your insightful comment. Following your suggestion, we have further elaborated on the potential role of nighttime  $\text{RO}_2$  in  $\text{NO}_3^-$  formation in Lhasa and its possible link to  $\text{NO}_3 + \text{VOC}$  pathway. Although the exact mechanism of nighttime  $\text{RO}_2$  production in Lhasa remains uncertain, previous studies have identified  $\text{NO}_3 + \text{VOC}$  reactions as the dominant source of  $\text{RO}_2$  during nighttime. This process forms alkyl and multifunctional nitrates ( $\text{RONO}_2$ ), which can undergo hydrolysis to yield  $\text{HNO}_3$ , contributing to  $\text{NO}_3^-$  production. We also acknowledge the importance of  $\text{O}_3$  and  $\text{NO}_2$  in controlling the nighttime  $\text{NO}_3$  radical production rate. Given that nighttime  $\text{O}_3$  concentrations in Lhasa are relatively high, it is plausible that  $\text{NO}_3$  radical levels are also elevated, enhancing  $\text{NO}_3 + \text{VOC}$  pathway. We have added it to the revised manuscript. **(Line 351-388)**

**Line 351-388:** On average, the relative contributions of  $\text{NO}_2 + \text{OH}$  ( $f_{\text{NO}_2+\text{OH}}$ ),  $\text{NO}_3 + \text{VOC}$  ( $f_{\text{NO}_3+\text{VOC}}$ ) and  $\text{N}_2\text{O}_5 + \text{H}_2\text{O}$  ( $f_{\text{N}_2\text{O}_5+\text{H}_2\text{O}}$ ) to  $\text{NO}_3^-$  formation in Lhasa during the sampling campaign were  $46 \pm 26\%$ ,  $26 \pm 19\%$  and  $28 \pm 11\%$ , respectively. To better understand the characteristics of  $\text{NO}_3^-$  formation mechanism in Lhasa, we performed a detailed comparison around the China for the relative contributions of key oxidation pathways using the  $\Delta^{17}\text{O}$  methodology (Figure 4). Overall, similar to most Chinese cities,  $\text{NO}_3^-$  formation in Lhasa was predominantly driven by the  $\text{NO}_2 + \text{OH}$  pathway, exhibiting distinct seasonal and regional variations. In particular, the average  $f_{\text{NO}_3+\text{VOC}}$  values were generally several times higher in spring in Lhasa than in other urban cities. Compared to rural/remote areas, the average  $f_{\text{NO}_3+\text{VOC}}$  values showed higher fractions in Lhasa, revealing the influence of anthropogenic emission, i.e., vehicle exhaust and

heating, on  $\text{NO}_3^-$  formation. In Lhasa, the Capital of Tibet, field measurements among different years showed a substantial increase in VOC concentrations in urban areas of the Tibet Plateau, comparable to those in North China (Tang et al., 2022), revealing the importance of the active  $\text{NO}_3 + \text{VOC}$  pathway for  $\text{NO}_3^-$  pollution formation in Lhasa. In fact, recent studies have recognized  $\text{NO}_3 + \text{VOC}$  as a major formation mechanism for  $\text{NO}_3^-$  production. For instance, Fan et al. (2021) found that  $f_{\text{NO}_3+\text{VOC}}$  in Beijing increased from 17% in summer to 32% in winter based on  $\Delta^{17}\text{O}-\text{NO}_3^-$  measurements. . He et al. (2018) estimated the relative contributions of  $\text{NO}_3 + \text{VOC}$  and  $\text{N}_2\text{O}_5 + \text{Cl}^-$  to  $\text{NO}_3^-$  formation and found that  $\text{NO}_3 + \text{VOC}$  and  $\text{N}_2\text{O}_5 + \text{Cl}^-$  were in the range of 16-56%, underscoring the significant roles of these pathways during haze events in Beijing. Similarly, Feng et al. (2023) also reported that the  $f_{\text{NO}_3+\text{VOC}}$  values were up to 49.6% in winter in northern China. In Guangzhou,, Wang et al. (2023) noted that the average  $f_{\text{NO}_3+\text{VOC}}$  value was at the 488m (25%) higher than that at the ground (12%). Furthermore, Li et al. (2022) reported that  $f_{\text{NO}_3+\text{VOC}}$  increased from 5% in urban to 13.5% in rural regions in Northeast China. Although the specific nighttime  $\text{RO}_2$  production mechanism in Lhasa remains unclear, studies in other cities have demonstrated that  $\text{NO}_3+\text{VOC}$  pathway was the dominant channel for nighttime  $\text{RO}_2$  (Fisher et al., 2016), which in turn leads to the formation of alkyl and multifunctional nitrates ( $\text{RONO}_2$ ) and eventually  $\text{NO}_3^-$ . In such cases, the  $\text{RO}_2$  concentration is expected to be correlated with  $\text{NO}_3$  radical production, which depends on the reaction rate of  $\text{O}_3$  and  $\text{NO}_2$  (Brown and Stutz, 2012). Given the relatively high nighttime  $\text{O}_3$  concentrations in Lhasa, it is plausible that  $\text{O}_3$ -driven nighttime  $\text{NO}_3$  chemistry plays an important role, thereby enhancing  $\text{NO}_3+\text{VOC}$  derived from  $\text{RO}_2$  production and  $\text{NO}_3^-$  formation. Global modelling studies also support the significant of this pathway. For instance, Alexander et al. (2020) reported that the  $\text{NO}_3 + \text{VOC}$  pathway via the  $\text{RONO}_2$  mechanism accounted for 3% of global  $\text{NO}_3^-$  formation on average. The relatively high  $f_{\text{NO}_3+\text{VOC}}$  values observed in Lhasa are broadly consistent with these findings, especially under conditions of high VOC concentrations and strong nighttime oxidant levels.



*4: I DONOT agree with the interpretation of the observed day-night differences in  $\Delta^{17}\text{O}-\text{NO}_3^-$  during winter and summer (Lines: 307-333). Remember that daytime  $\text{NO}_3$  and  $\text{N}_2\text{O}_5$  chemistry should be negligible in nitrate chemistry, and no supporting evidence for this claim could be found in reference in Brown et al., 2011. Note high  $\text{NO}_3$  production rate not means high mixing ratio of  $\text{NO}_3$ ,  $\text{NO}_3$  and  $\text{N}_2\text{O}_5$  will be rapidly decomposed under sunlight. Although there are increasing studies showing the potential impact of daytime  $\text{NO}_3$  radical chemistry, the importance of daytime  $\text{NO}_3/\text{N}_2\text{O}_5$  chemistry should be investigated with concurrent field observations or model experiments. The atmospheric residence time of nitrate should be considered for the comparison of day-night difference in  $\Delta^{17}\text{O}-\text{NO}_3^-$ , see Vicars et al., 2013.*

Response: Thanks for your valuable suggestion. Specifically, we acknowledge that under typical atmospheric conditions,  $\text{NO}_3$  and  $\text{N}_2\text{O}_5$  are rapidly photolyzed during the day, with reported  $\text{NO}_3$  lifetimes of less than 10 seconds in sunlight, making their daytime accumulation negligible. However, we also note that several recent studies suggest that daytime  $\text{NO}_3$  production rates can be non-negligible, especially in winter. To address the reviewer's concern, we have clarified the distinction between production rate and ambient concentration, and we now explicitly acknowledge the uncertainty in the role of daytime  $\text{NO}_3/\text{N}_2\text{O}_5$  chemistry. Additionally, we now consider the atmospheric residence time of nitrate, as recommended (Vicars et al., 2013), which may lead to integrated contributions from both daytime and nighttime chemistry in each sample. **(Line 450-484)**

**Line 450-484:** Interestingly, distinct diurnal patterns of  $\text{NO}_3^-$  oxidation pathways were observed during the sampling campaign (Figure 5). In summer,  $\text{NO}_2 + \text{OH}$  pathway showed a significantly higher contribution during the daytime (55.1%) compared to nighttime (44.9%), which is attributed to increased OH radical synthesis during longer days and higher temperatures in Lhasa (Rohrer and Berresheim, 2006). A previous study indicated that lower  $\text{NO}_2$  and higher  $\text{O}_3$  concentrations enhance the relative contribution of OH pathway to  $\text{NO}_3^-$  formation (Wang et al., 2019). Additionally, the concentration of ALWC (the detailed information is given in Text S3) was higher at night than during the day in summer, favoring  $\text{NO}_3^-$  formation through nocturnal

formation. In winter,  $f_{\text{NO}_2+\text{OH}}$ ,  $f_{\text{NO}_3+\text{VOC}}$  and  $f_{\text{N}_2\text{O}_5+\text{H}_2\text{O}}$  were similar during both day and night. Typically, photolytic destruction and chemical reactions with NO are rapid sinks during the daytime, with lifetimes generally less than 5 seconds and resulting in extremely low concentrations. Similarly, the atmospheric lifetime of  $\text{N}_2\text{O}_5$  under sunlight is also very short (Wang et al., 2018). Thus, daytime  $\text{NO}_3$  and  $\text{N}_2\text{O}_5$  chemistry is often considered negligible. However, a recent study revealed that a non-negligible amount of  $\text{NO}_3$  radicals can persist during the daytime in cold months, owing to the limited solar radiation (Hellén et al., 2018). Wang et al. (2020a) found that the daytime production rate of  $\text{NO}_3$  can be substantial due to elevated concentrations of  $\text{O}_3$  and  $\text{NO}_2$ , suggesting that the mixing ratios of  $\text{NO}_3$  and  $\text{N}_2\text{O}_5$  during the day may not be negligible. Furthermore, in winter, lower temperatures and elevated  $\text{NO}_2$  concentrations facilitate a quasi-steady-state equilibrium between  $\text{NO}_3$  and  $\text{N}_2\text{O}_5$ , slowing the overall reactivity of the  $\text{NO}_3^-$  precursors (Brown et al., 2003). This equilibrium condition minimizes diurnal fluctuations in precursor concentrations, resulting in relatively stable nocturnal and daytime  $\text{NO}_3^-$  formation pathways, including  $\text{NO}_3 + \text{VOC}$  and  $\text{N}_2\text{O}_5 + \text{H}_2\text{O}$ . Nevertheless, we acknowledge that the exact role of daytime  $\text{NO}_3/\text{N}_2\text{O}_5$  chemistry remains uncertain in Lhasa and should be further assessed using concurrent field observations or chemical transport models. Moreover, when interpreting the diurnal differences in  $\Delta^{17}\text{O}-\text{NO}_3^-$  values, the atmospheric lifetime of  $\text{NO}_3^-$  must be considered. Given the atmospheric lifetime of  $\text{NO}_3^-$  is generally more than 12 hours, each sample might reflect both daytime and nighttime  $\text{NO}_3^-$  production impacting on  $\Delta^{17}\text{O}-\text{NO}_3^-$  values (Park et al., 2004; Vicars et al., 2013).

## General comment

***1: The description of nitrate formation pathways (Text S1) and the associated  $\Delta^{17}\text{O}$  signatures should be presented in the main text.***

Response: Thanks for your suggestion. We have added it to the main text in the revised manuscript (2.4).

**2: Line 62-63 Numerous field experiments have demonstrated that the  $N_2O_5$  uptake probability on aerosol varied significantly, depending on the aerosol composition, meteorological parameters.**

Response: Thanks for your valuable suggestion. We have clarified this point in the revised manuscript by specifying that one of the major sources of uncertainty in modelling  $NO_3^-$  formation via the  $N_2O_5 + H_2O$  pathway is the wide variability in the  $N_2O_5$  uptake probability ( $\gamma$ ), which has been shown in numerous field experiments to depend strongly on aerosol composition and meteorological conditions such as temperature and relative humidity. **(Line 72-75)**

**Line 72-75:** However, there is considerable uncertainty in modelling the contribution of individual oxidation pathways to  $NO_3^-$  formation, particularly for the  $N_2O_5 + H_2O$  pathway, due to the wide variability of key parameters such as the  $N_2O_5$  uptake coefficient, which has been shown to vary significantly with aerosol composition, relative humidity, and temperature.

**3: Line 237: I think the highlight of the text is the comparison of nitrate chemistry in high-elevation city with that in plain region. More discussion is needed to explore the mechanisms regulating the nitrate oxidation pathways, rather than a simple comparison of relative importance.**

Response: Thanks for your suggestion. Specifically, we have expanded the discussion to include potential mechanisms that may regulate the observed differences in oxidation pathways, with a particular focus on the  $NO_3 + VOC$  pathway. In this context, we discuss the role of elevated nighttime  $O_3$  concentrations in Lhasa. Since this issue overlaps with the reviewer's Specific Comment 3 regarding the role of nighttime  $RO_2$  and the importance of linking  $NO_3$  radical production to ambient oxidant levels, we addressed both concerns together in the revised discussion to provide a more robust and coherent mechanistic interpretation.

**4: Line 345-347 Recent field radical measurements in urban sites in China found that OH and HO2 radical during haze period is comparable to clean days, see Slater**

*et al., 2020, Lu et al., 2019.*

**Response:** Thanks for your suggestion. We sincerely apologize for not citing the most up-to-date literature in our original manuscript. Initially, we referred to earlier studies, which may have led to an outdated understanding of radical behavior under polluted conditions. In response to the reviewer's helpful comment, we have carefully reviewed recent findings and incorporated updated references (Slater et al., 2020; Yang et al., 2021), which indicate that OH and HO<sub>2</sub> radical levels during haze periods can be comparable to those on clean days in urban China. We have revised the manuscript.

**(Line 502-511)**

**Line 502-511:** As shown in Figure S8, NO<sub>3</sub> + VOC pathway emerged as the major contributor to NO<sub>3</sub><sup>-</sup> formation during periods of high NO<sub>3</sub><sup>-</sup> spikes. To elucidate the NO<sub>3</sub><sup>-</sup> formation pathways under different NO<sub>3</sub><sup>-</sup> concentrations, NO<sub>3</sub><sup>-</sup> samples were categorized into different concentration ranges (Figure 6). We found the  $f_{\text{NO}_3+\text{VOC}}$  values increased and  $f_{\text{NO}_2+\text{OH}}$  values decreased with the NO<sub>3</sub><sup>-</sup> concentrations. Although recent field radical measurements in urban sites in China found that OH and HO<sub>2</sub> radical during haze period is comparable to clean days (Slater et al., 2020; Yang et al., 2021), our results suggested that NO<sub>3</sub>+VOC pathway still played an important role in NO<sub>3</sub><sup>-</sup> production under high-NO<sub>3</sub><sup>-</sup> concentration in Lhasa, possibly due to enhanced VOC emission.

**5: Line 373** *The implication sounds impotent. It is well known that aerosol liquid water content (ALWC) and Ox (oxidation capacity) regulate nitrate concentrations—ALWC impacts gas-to-particle partitioning, while Ox affects oxidation efficiency. The authors should focus on the specific or unique environmental conditions in the Tibetan Plateau that could be reflected by the measurements of  $\Delta^{17}\text{O}-\text{NO}_3^-$ .*

**Response:** Thanks for your suggestion. We have strengthened the Implications section to better highlight the unique environmental conditions of the Tibetan Plateau, particularly those that influence nitrate oxidation as captured by  $\Delta^{17}\text{O}-\text{NO}_3^-$ . Specifically, we now emphasize the role of high solar radiation, persistently elevated O<sub>3</sub> levels, and seasonally enhanced VOC concentrations in Lhasa, which together

promote active  $\text{NO}_3 + \text{VOC}$  chemistry — especially in spring. These features are characteristic of high-altitude urban environments and contribute to the distinct oxidation pathways observed in this region.

At the same time, we acknowledge the limitations of our study. Due to the lack of direct observations of  $\text{RO}_2$  concentrations in Lhasa, we adopted empirical estimations based on other regions, which introduces uncertainty into the pathway apportionment. Additionally, the absence of measurements related to nighttime NO emissions and  $\text{NO}_2$ -NO isotope exchange in the region may affect the accuracy of the diurnal pattern interpretation. We have added these points to the revised Implications section to clarify the scope and robustness of our conclusions. **(Line 540-559)**

**Line 540-559:** The oxidation pathways of  $\text{NO}_3^-$  in Lhasa, China, were constrained using a full year of  $\Delta^{17}\text{O}-\text{NO}_3^-$  measurements from 2022 to 2023. Based on seasonal data, we observed a significant increase in the relative contribution of the  $\text{NO}_3 + \text{VOC}$  to  $\text{NO}_3^-$  formation during spring. Furthermore, the diurnal distribution of  $\text{NO}_3^-$  oxidation pathways varied distinctly across seasons. To better understand the factors influencing these pathways, we integrated meteorological conditions,  $\text{NO}_x$  precursors, and ALWC for a more comprehensive analysis of  $\text{NO}_3^-$  formation. The results revealed that Ox and ALWC are more reliable indicators of  $\text{NO}_3^-$  oxidation pathways than meteorological factors. Notably, Lhasa's unique high-altitude environment such as strong solar radiation, persistently high  $\text{O}_3$ , and seasonally elevated VOC, promotes active  $\text{NO}_3 + \text{VOC}$  chemistry, especially in spring. Atmospheric ALWC is primarily produced by hygroscopic aerosols such as  $\text{SO}_4^{2-}$ ,  $\text{NH}_4^+$ , and  $\text{Cl}^-$ . Therefore, in addition to controlling  $\text{NO}_2$ ,  $\text{O}_3$ , and VOC, reducing these hygroscopic aerosols is crucial for effective  $\text{PM}_{2.5}$  pollution control.

Although this study provides valuable insights into  $\text{NO}_3^-$  formation mechanisms in Lhasa, we must acknowledge the associated uncertainties due to the lack of comprehensive observational constraints in Lhasa. Specifically, the limited understanding of local  $\text{RO}_2$  concentrations led us to adopt empirical parameterizations and refer to measurements from other regions, which inevitably introduce uncertainty into the pathway apportionment. In addition, the absence of direct observations of

nighttime NO emissions and the NO<sub>2</sub>-NO isotope exchange processes in this region further complicates the interpretation of diurnal variations in NO<sub>3</sub><sup>-</sup> formation pathways. To improve the robustness of  $\Delta^{17}\text{O}$ -based pathway analysis, future studies should consider synchronous measurements of both NO<sub>2</sub> and NO<sub>3</sub><sup>-</sup> isotopes.

***6: Additionally, many sentences throughout the manuscript require careful revision for clarity and grammar (e.g., Lines 31–33)***

Response: Thanks for your suggestion. We have carefully reviewed and revised the entire manuscript to improve the clarity, grammar, and overall readability of all sentences, including the example in Lines 31–33.

## Reference

- Alexander, B., Sherwen, T., Holmes, C. D., Fisher, J. A., Chen, Q., Evans, M. J., and Kasibhatla, P.: Global inorganic nitrate production mechanisms: comparison of a global model with nitrate isotope observations, *Atmospheric Chemistry and Physics*, 20, 3859-3877, 2020.
- Brown, S. S. and Stutz, J.: Nighttime radical observations and chemistry, *Chemical Society Reviews*, 41, 6405-6447, 2012.
- Brown, S. S., Stark, H., and Ravishankara, A.: Applicability of the steady state approximation to the interpretation of atmospheric observations of  $\text{NO}_3$  and  $\text{N}_2\text{O}_5$ , *Journal of Geophysical Research: Atmospheres*, 108, 2003.
- Cristofanelli, P., Bracci, A., Sprenger, M., Marinoni, A., Bonafè, U., Calzolari, F., Duchi, R., Laj, P., Pichon, J.-M., and Roccato, F.: Tropospheric ozone variations at the Nepal Climate Observatory-Pyramid (Himalayas, 5079 m asl) and influence of deep stratospheric intrusion events, *Atmospheric Chemistry and Physics*, 10, 6537-6549, 2010.
- Fan, M.-Y., Zhang, Y.-L., Lin, Y.-C., Hong, Y., Zhao, Z.-Y., Xie, F., Du, W., Cao, F., Sun, Y., and Fu, P.: Important role of  $\text{NO}_3$  radical to nitrate formation aloft in urban Beijing: Insights from triple oxygen isotopes measured at the tower, *Environmental Science & Technology*, 56, 6870-6879, 2021.
- Feng, X., Chen, Y., Chen, S., Peng, Y., Liu, Z., Jiang, M., Feng, Y., Wang, L., Li, L., and Chen, J.: Dominant Contribution of  $\text{NO}_3$  Radical to  $\text{NO}_3^-$  Formation during Heavy Haze Episodes: Insights from High-Time Resolution of Dual Isotopes  $\Delta^{17}\text{O}$  and  $\delta^{18}\text{O}$ , *Environmental Science & Technology*, 57, 20726-20735, 2023.
- Fisher, J. A., Jacob, D. J., Travis, K. R., Kim, P. S., Marais, E. A., Chan Miller, C., Yu, K., Zhu, L., Yantosca, R. M., Sulprizio, M. P., Mao, J., Wennberg, P. O., Crounse, J. D., Teng, A. P., Nguyen, T. B., St. Clair, J. M., Cohen, R. C., Romer, P., Nault, B. A., Wooldridge, P. J., Jimenez, J. L., Campuzano-Jost, P., Day, D. A., Hu, W., Shepson, P. B., Xiong, F., Blake, D. R., Goldstein, A. H., Misztal, P. K., Hanisco, T. F., Wolfe, G. M., Ryerson, T. B., Wisthaler, A., and Mikoviny, T.: Organic nitrate chemistry and its implications for nitrogen budgets in an isoprene- and monoterpene-rich

- atmosphere: constraints from aircraft (SEAC4RS) and ground-based (SOAS) observations in the Southeast US, *Atmos. Chem. Phys.*, 16, 5969-5991, 10.5194/acp-16-5969-2016, 2016.
- He, P., Xie, Z., Chi, X., Yu, X., Fan, S., Kang, H., Liu, C., and Zhan, H.: Atmospheric  $\Delta^{17}\text{O}(\text{NO}_3^-)$  reveals nocturnal chemistry dominates nitrate production in Beijing haze, *Atmospheric Chemistry and Physics*, 18, 14465-14476, 2018.
- Hellén, H., Praplan, A. P., Tykkä, T., Ylivinkka, I., Vakkari, V., Bäck, J., Petäjä, T., Kulmala, M., and Hakola, H.: Long-term measurements of volatile organic compounds highlight the importance of sesquiterpenes for the atmospheric chemistry of a boreal forest, *Atmospheric Chemistry and Physics*, 18, 13839-13863, 2018.
- Li, H., He, Q., Song, Q., Chen, L., Song, Y., Wang, Y., Lin, K., Xu, Z., and Shao, M.: Diagnosing Tibetan pollutant sources via volatile organic compound observations, *Atmospheric Environment*, 166, 244-254, 2017.
- Li, Z., Walters, W. W., Hastings, M. G., Song, L., Huang, S., Zhu, F., Liu, D., Shi, G., Li, Y., and Fang, Y.: Atmospheric nitrate formation pathways in urban and rural atmosphere of Northeast China: Implications for complicated anthropogenic effects, *Environmental Pollution*, 296, 118752, <https://doi.org/10.1016/j.envpol.2021.118752>, 2022.
- Lin, M., Zhang, Z., Su, L., Hill-Falkenthal, J., Priyadarshi, A., Zhang, Q., Zhang, G., Kang, S., Chan, C. Y., and Thiemens, M. H.: Resolving the impact of stratosphere-to-troposphere transport on the sulfur cycle and surface ozone over the Tibetan Plateau using a cosmogenic  $^{35}\text{S}$  tracer, *Journal of Geophysical Research: Atmospheres*, 121, 439-456, 2016.
- Morin, S., Savarino, J., Bekki, S., Gong, S., and Bottenheim, J.: Signature of Arctic surface ozone depletion events in the isotope anomaly ( $\Delta^{17}\text{O}$ ) of atmospheric nitrate, *Atmospheric Chemistry and Physics*, 7, 1451-1469, 2007.
- Park, R. J., Jacob, D. J., Field, B. D., Yantosca, R. M., and Chin, M.: Natural and transboundary pollution influences on sulfate-nitrate-ammonium aerosols in the United States: Implications for policy, *Journal of Geophysical Research: Atmospheres*, 109, 2004.



- Phillips, D. L., Inger, R., Bearhop, S., Jackson, A. L., Moore, J. W., Parnell, A. C., Semmens, B. X., and Ward, E. J.: Best practices for use of stable isotope mixing models in food-web studies, *Canadian Journal of Zoology*, 92, 823-835, 10.1139/cjz-2014-0127, 2014.
- Rohrer, F. and Berresheim, H.: Strong correlation between levels of tropospheric hydroxyl radicals and solar ultraviolet radiation, *Nature*, 442, 184-187, 2006.
- Slater, E. J., Whalley, L. K., Woodward-Massey, R., Ye, C., Lee, J. D., Squires, F., Hopkins, J. R., Dunmore, R. E., Shaw, M., Hamilton, J. F., Lewis, A. C., Crilley, L. R., Kramer, L., Bloss, W., Vu, T., Sun, Y., Xu, W., Yue, S., Ren, L., Acton, W. J. F., Hewitt, C. N., Wang, X., Fu, P., and Heard, D. E.: Elevated levels of OH observed in haze events during wintertime in central Beijing, *Atmos. Chem. Phys.*, 20, 14847-14871, 10.5194/acp-20-14847-2020, 2020.
- Tang, G., Yao, D., Kang, Y., Liu, Y., Liu, Y., Wang, Y., Bai, Z., Sun, J., Cong, Z., Xin, J., Liu, Z., Zhu, Z., Geng, Y., Wang, L., Li, T., Li, X., Bian, J., and Wang, Y.: The urgent need to control volatile organic compound pollution over the Qinghai-Tibet Plateau, *iScience*, 25, 105688, <https://doi.org/10.1016/j.isci.2022.105688>, 2022.
- Vicars, W., Morin, S., Savarino, J., Wagner, N., Erbland, J., Vince, E., Martins, J., Lerner, B., Quinn, P., and Coffman, D.: Spatial and diurnal variability in reactive nitrogen oxide chemistry as reflected in the isotopic composition of atmospheric nitrate: Results from the CalNex 2010 field study, *Journal of Geophysical Research: Atmospheres*, 118, 50567-510,588, 2013.
- Wang, H., Chen, X., Lu, K., Hu, R., Li, Z., Wang, H., Ma, X., Yang, X., Chen, S., Dong, H., Liu, Y., Fang, X., Zeng, L., Hu, M., and Zhang, Y.: NO<sub>3</sub> and N<sub>2</sub>O<sub>5</sub> chemistry at a suburban site during the EXPLORE-YRD campaign in 2018, *Atmospheric Environment*, 224, 117180, <https://doi.org/10.1016/j.atmosenv.2019.117180>, 2020a.
- Wang, H., Lu, K., Guo, S., Wu, Z., Shang, D., Tan, Z., Wang, Y., Le Breton, M., Lou, S., Tang, M., Wu, Y., Zhu, W., Zheng, J., Zeng, L., Hallquist, M., Hu, M., and Zhang, Y.: Efficient N<sub>2</sub>O<sub>5</sub> uptake and NO<sub>3</sub> oxidation in the outflow of urban Beijing, *Atmos. Chem. Phys.*, 18, 9705-9721, 10.5194/acp-18-9705-2018, 2018.
- Wang, K., Hattori, S., Kang, S., Lin, M., and Yoshida, N.: Isotopic constraints on the

- formation pathways and sources of atmospheric nitrate in the Mt. Everest region, *Environmental Pollution*, 267, 115274, 2020b.
- Wang, Y., Liu, J., Jiang, F., Chen, Z., Wu, L., Zhou, S., Pei, C., Kuang, Y., Cao, F., and Zhang, Y.: Vertical measurements of stable nitrogen and oxygen isotope composition of fine particulate nitrate aerosol in Guangzhou city: Source apportionment and oxidation pathway, *Science of The Total Environment*, 865, 161239, 2023.
- Wang, Y. L., Song, W., Yang, W., Sun, X. C., Tong, Y. D., Wang, X. M., Liu, C. Q., Bai, Z. P., and Liu, X. Y.: Influences of atmospheric pollution on the contributions of major oxidation pathways to PM<sub>2.5</sub> nitrate formation in Beijing, *Journal of Geophysical Research: Atmospheres*, 124, 4174-4185, 2019.
- Yang, X., Lu, K., Ma, X., Liu, Y., Wang, H., Hu, R., Li, X., Lou, S., Chen, S., and Dong, H.: Observations and modeling of OH and HO<sub>2</sub> radicals in Chengdu, China in summer 2019, *Science of The Total Environment*, 772, 144829, 2021.
- Yin, X., Kang, S., de Foy, B., Cong, Z., Luo, J., Zhang, L., Ma, Y., Zhang, G., Rupakheti, D., and Zhang, Q.: Surface ozone at Nam Co in the inland Tibetan Plateau: variation, synthesis comparison and regional representativeness, *Atmospheric Chemistry and Physics*, 17, 11293-11311, 2017.
- Zhang, Y.-L., Zhang, W., Fan, M.-Y., Li, J., Fang, H., Cao, F., Lin, Y.-C., Wilkins, B. P., Liu, X., and Bao, M.: A diurnal story of  $\Delta^{17}\text{O}(\text{NO}_3^-)$  in urban Nanjing and its implication for nitrate aerosol formation, *npj Climate and Atmospheric Science*, 5, 50, 2022.
- Zhang, Y., Zhao, T., Ning, G., Xu, X., Chen, Z., Jia, M., Sun, X., Shu, Z., Lu, Z., and Liu, J.: A unique mechanism of ozone surges jointly triggered by deep stratospheric intrusions and the Tibetan Plateau topographic forcing, *Geophysical Research Letters*, 52, e2024GL114207, 2025.
